# Supplementary material for: Lipid Metabolism Reprogramming Is Associated with Trastuzumab Resistance in ERBB2+ Breast Cancer Cell Lines
Source: Preprints.org preprint supplement (doi:10.20944/preprints202304.0002.v1), 2023-04-03
Supplement: Supplementary file 1 [file supplementary]

## Sheet: Sheet1
Table S3. Differentially expressed proteins (DEPS) in BT474, MDA-MB-361, and SKBR-3Tz-R vs. wt cells. Upregulated proteins in Tz-R cells are in green background while the downregulated ones are in red background.
BT474	MDA-MB-361	SKBR-3
ABHD3	ANKRD39	ABCC4
ACBD7	ARHGAP12	ACSL5
ANKRD39	ARR3	ADCK1
CD82	AUH	AFG1L
CDK6	CBL	AKR1C2
CLGN	CCNL1	ANAPC1
CST1	CHAC2	ANO6
CTH	CRABP2	ARHGAP12
CYB561D2	CRBN	ARHGAP8
DCAF4L2	CRIP1	ARSD
DCTD	DENND4C	AZGP1
DDX58	DOCK9	C12orf73
DHRS3	ELOF1	C1orf122
DNAJC12	FAM174B	C1orf52
EFS	GLDC	CA2
ELP5	GPT2	CBS
FAM174B	HMGN1	CCDC134
FLG2	IVL	CDKN2AIPNL
GCC1	KIFC1	CEBPB
GGT5	KTI12	CHCHD5
GNL3L	MARK3	CLYBL
GNPDA2	MED20	CNST
GNPTG	MEST	DCAF4L2
GPX4	METTL2B	DCAKD
HRNR	MRM2	DEPTOR
HSPA12A	MRPL32	DHRS3
HSPA6	MYORG	DNAJC12
IFIH1	N4BP3	DOLPP1
ITPRID2	NUB1	EIF4ENIF1
KTI12	PANK1	ELOVL5
KYNU	PRPF40B	EPDR1
METTL2B	RICTOR	FAM234A
MOCS2	SLC25A35	FAM3B
MUC5AC	STAP2	FBLN1
MXRA8	TACC3	FMOD
N6AMT1	TCP11L1	FN3K
NCAM2	TDRD1	FOXRED2
NOPCHAP1	TMEM115	FUCA2
NSD2	TMF1	GDAP1
OBSL1	TNIP2	GFRA1
PABPC3	TRAPPC6B	GNAI1
PALS2	TRMT2B	GSPT2
PCP4	UBE2B	GSTT1
PDLIM2	UBE2E1	GTF3C2
PHKA2	VGF	GTSF1
PIGQ	VPS37C	H1-6
PMM1	WDR4	HDGFL3
PPFIBP1	ZC3H13	HMOX1
PPP1R1B	ABHD3	LAMB2
PROCR	AGPS	LRRC8E
PYGL	ANTKMT	MAGEA1
RAB31	APOBEC3B	MARK3
RPUSD2	ATG2A	MBOAT2
S100P	AZGP1	MCM3AP
SAPCD2	BAK1	MED14
SMYD2	BRD9	MED16
STK4	C2CD5	MED17
TACC3	CASZ1	MED20
TANK	CCDC9	METTL18
TK2	CD82	MGME1
TMEM62	CDK6	MID1IP1
TMSB15A	CLCA2	MTARC1
TRMT2B	CPVL	MTG1
TSKU	CRAT	MUC1
TUSC3	CTIF	MYH11
UNC13C	CYRIA	N6AMT1
USP4	DNAJB2	NAF1
VPS35L	DNAJB4	NDUFAF6
WASHC2C	DOCK11	NFIC
WBP2	DUSP23	NLRX1
ABCC5	ECHDC1	NUB1
ADCK1	EEF1AKMT4	OAS3
AFG1L	ENPP1	OBSL1
AHCYL2	EPHB3	OGFOD1
ALG9	ESF1	P3H1
APOOL	FMOD	PABPC3
ATP6V0C	FOLH1	PBXIP1
ATR	FRS2	PDP1
BRD9	GCC1	PDPR
CEBPB	GNAI1	PLEKHG4B
CHD1L	GNL3L	PLSCR3
CHPT1	HECA	PPP1R1B
CLCN7	HSPA6	RAD51C
COPS7B	ITGB6	RAP1A
CSRP2	KCNN4	RPIA
CTNND2	KIFAP3	SCYL3
CWC27	KLC3	SGSM3
DNAJB2	KRT17	SLAIN2
EIPR1	LIMS1	SLC25A17
GEMIN6	LRRC41	SLC2A10
GFRA1	LRRC8D	SLC30A9
GGCX	MBOAT2	SLC38A2
GLDC	MCL1	STK4
GPAT4	METTL18	SULT2B1
GSDMD	MGP	TAF5
GTF2A1	MTMR14	TBC1D1
IL18	N6AMT1	TBX3
KIFAP3	NCAPD3	TK2
KITLG	NDC1	TMEM177
LMBRD2	NOPCHAP1	TMX4
MRM2	PBX1	TNS3
MTG1	PDLIM2	TRAPPC6B
MYORG	PLEKHA5	TRIP4
NAF1	PPFIBP1	TRMT2B
NCOR1	PRKCA	TRUB2
NDC1	PROCR	TSC2
NGDN	PTER	TXNIP
NMNAT1	RDH10	UGT3A2
PALLD	RFK	VGF
PBX1	RIC8A	XAGE2
PGM5	RNF168	ZBTB21
PGS1	ROCK1	ZC3H13
PIN4	SCGB1D2	ZNF552
PNKD	SCPEP1	ZNHIT2
PRPF40B	SHCBP1	ABCA12
PRUNE1	SLC27A1	ABCD1
PSMB8	SLC35F2	ACE
RAB20	SMYD2	ACOT2
RAB5IF	SPAG1	AGPAT1
RXRA	SRGAP2C	AHCYL2
SDHAF3	SRR	ALDH1L1
SEC14L2	SYNRG	ALG11
SESTD1	TBPL1	ANAPC7
SLC30A9	TGFB3	ANKRD22
SLC35B1	THBS1	APOOL
SRGAP2C	THNSL1	ASRGL1
TBC1D1	TK2	ATP6V0A4
TBPL1	TMEM62	BMP7
TMEM38B	TNFAIP8	BPGM
TRABD	TRUB2	BRD9
TSPAN14	TSKU	C2CD5
UBE4A	TUSC3	CALCOCO2
UBN1	UIMC1	CASP14
UGT3A2	VPS26B	CBL
UQCC1	WDR45	CDH2
UXS1	ZKSCAN1	CLCN7
VPS13D	ZNF146	CMC2
WDR45	ZNF552	COPS7B
WRAP53		CRABP2
XAGE2		CRTAP
ZKSCAN1		CST1
		CST3
		CTSZ
		CYB561D2
		ZFTRAF1
		DDX19B
		DENND1A
		DHRS11
		DHRSX
		DNAJB2
		EHMT1
		EHMT2
		ELMO3
		EPS8
		ETNK1
		FKBP11
		FOLH1
		GALNT12
		GCC1
		GCHFR
		GEMIN6
		GSN
		HDAC6
		HECA
		HELLS
		HMGN5
		HOOK2
		IGFBP4
		ITGB6
		IVL
		KCTD5
		LCP1
		LPGAT1
		LXN
		MACC1
		MAPRE3
		MCRIP1
		MDK
		MSRB2
		MUC6
		NEK9
		NME4
		NOPCHAP1
		P2RX4
		PAIP2
		PBLD
		PCP4
		PGS1
		PLBD1
		PRKACB
		PRKCA
		PTGR1
		RAD9A
		RARS2
		RCE1
		RETREG3
		SCGB1D2
		SLC27A2
		SLC35F2
		SLC39A11
		SLFN5
		SMAD4
		SPATS2
		SRGAP2C
		TAF7
		TANC2
		TGFBR1
		THNSL1
		TM7SF2
		TMEM9
		TNFAIP2
		TNIP2
		TOB1
		TONSL
		TRIM27
		UBE2B
		USP32
		WDR45
		ZKSCAN1
		ZNF346
