# Supplementary material for: Lipid Metabolism Reprogramming Is Associated with Trastuzumab Resistance in ERBB2+ Breast Cancer Cell Lines
Source: Preprints.org preprint supplement (doi:10.20944/preprints202304.0002.v1), 2023-04-03
Supplement: Supplementary file 2 [file Table S1.xlsx]

## Sheet: Sheet1
Table S1. Proteins relevant for resistance to ERBB2-targeted therapies in BCa found with high FDR confidence in samples from the cell lines used in the study. Abundance ratio with statistically significant adjusted P-values (P<0.05) are highlighted in yellow.
Gene Symbol	Protein FDR Confidence: Combined	Coverage [%]	Abundance Ratio: BT474 Tz-R/wt	Abundance Ratio: MDA-MB-361 Tz-R/wt	Abundance Ratio: SKBR-3 Tz-R/wt
AKT1	High	9	1.294	1.258	0.721
AKT2	High	7	1.767	0.998	0.967
CD44	High	2	1.259	0.826	0.881
CDK12	High	17	1.199	1.019	1.198
CDK4	High	16	1.066	1.105	0.696
CDK6	High	7	100	0.01	1.014
EGFR	High	23	0.939	1.077	2.501
ERBB2	High	44	0.93	0.552	0.899
ERBB3	High	2	0.594	0.742	1.489
MUC1	High	3	1.611	1.299	100
PGR	High	19	0.761	1.504	1.894
PIK3C2A	High	2	0.771	0.747	0.969
PIK3C3	High	1	1.445	1.229	0.786
TP53	High	18	0.502	0.455	1
