# Supplementary material for: Lipid Metabolism Reprogramming Is Associated with Trastuzumab Resistance in ERBB2+ Breast Cancer Cell Lines
Source: Preprints.org preprint supplement (doi:10.20944/preprints202304.0002.v1), 2023-04-03
Supplement: Supplementary file 3 [file Table S2.xlsx]

## Sheet: Foglio1
Table S2. Results of the Brown-Forsythe and Welch ANOVA test with a Dunnett’s T3 multiple comparisons test of the ERBB2 expressed on the plasma membrane of the cell lines used in the study.
Dunnett's T3 multiple comparisons test	Mean Diff,	95,00% CI of diff,	Below threshold?	Summary	Adjusted P Value
BT474 wt vs. BT474 Tz-R	78732	-4322 to 161786	No	ns	0.0578
BT474 wt vs. MDA-MB-361 wt	721551	682679 to 760423	Yes	****	<0,0001
BT474 wt vs. MDA-MB-361 Tz-R	1001686	960631 to 1042741	Yes	****	<0,0001
BT474 wt vs. SK wt	251839	211022 to 292656	Yes	****	<0,0001
BT474 wt vs. SK Tz-R	-274199	-535648 to -12750	Yes	*	0.0456
BT474 Tz-R vs. MDA-MB-361 wt	642819	564219 to 721419	Yes	***	0.0001
BT474 Tz-R vs. MDA-MB-361 Tz-R	922954	811541 to 1034367	Yes	***	0.0008
BT474 Tz-R vs. SK wt	173107	93074 to 253141	Yes	**	0.0055
BT474 Tz-R vs. SK Tz-R	-352931	-540149 to -165713	Yes	**	0.0082
MDA-MB-361 wt vs. MDA-MB-361 Tz-R	280135	249063 to 311207	Yes	****	<0,0001
MDA-MB-361 wt vs. SK wt	-469712	-503996 to -435428	Yes	****	<0,0001
MDA-MB-361 wt vs. SK Tz-R	-995750	-1254153 to -737347	Yes	**	0.0035
MDA-MB-361 Tz-R vs. SK wt	-749847	-784386 to -715309	Yes	****	<0,0001
MDA-MB-361 Tz-R vs. SK Tz-R	-1275885	-1532015 to -1019755	Yes	**	0.0021
SK wt vs. SK Tz-R	-526038	-785407 to -266669	Yes	*	0.0124
